# Supplementary material for: Impact of an internal medicine nocturnist service on care of patients with cancer at a large Canadian teaching hospital: a quality-improvement study
Source: PubMed Central journal article supplement — CMAJ Open. 2021 Jun 18;9(2):E667–72. doi: 10.9778/cmajo.20200167 (PMC8248558; doi:10.9778/cmajo.20200167), 2021-06-18
Supplement: 2020-0167-1-at.pdf [file 2020-0167-1-at.pdf]

## Faculty survey instrument.

| Question                                                                                                                                                                                                                                                                                                                                                                                                                                                                                                                                                                                                                                                                                                                                                                                                                                                                                                                                                                                                                                                                                                                                                                                                                                                                                                                                                                                                                                                                                                  | Input Options                                                                                                          |
|-----------------------------------------------------------------------------------------------------------------------------------------------------------------------------------------------------------------------------------------------------------------------------------------------------------------------------------------------------------------------------------------------------------------------------------------------------------------------------------------------------------------------------------------------------------------------------------------------------------------------------------------------------------------------------------------------------------------------------------------------------------------------------------------------------------------------------------------------------------------------------------------------------------------------------------------------------------------------------------------------------------------------------------------------------------------------------------------------------------------------------------------------------------------------------------------------------------------------------------------------------------------------------------------------------------------------------------------------------------------------------------------------------------------------------------------------------------------------------------------------------------|------------------------------------------------------------------------------------------------------------------------|
| Please select the faculty position with which you identify.                                                                                                                                                                                                                                                                                                                                                                                                                                                                                                                                                                                                                                                                                                                                                                                                                                                                                                                                                                                                                                                                                                                                                                                                                                                                                                                                                                                                                                               | Choices: Full-Time Faculty Member, Part-Time Faculty Member                                                            |
| How many years have you been in independent practice?                                                                                                                                                                                                                                                                                                                                                                                                                                                                                                                                                                                                                                                                                                                                                                                                                                                                                                                                                                                                                                                                                                                                                                                                                                                                                                                                                                                                                                                     | Numerical input                                                                                                        |
| In your clinical experience at Toronto General Hospital, have you had any experience with the TGH GIM-Oncology Overnight Hospitalist / "Nocturnist"?                                                                                                                                                                                                                                                                                                                                                                                                                                                                                                                                                                                                                                                                                                                                                                                                                                                                                                                                                                                                                                                                                                                                                                                                                                                                                                                                                      | Choices: Yes, No                                                                                                       |
| Are you satisfied with the overall quality of care delivered at TGH?                                                                                                                                                                                                                                                                                                                                                                                                                                                                                                                                                                                                                                                                                                                                                                                                                                                                                                                                                                                                                                                                                                                                                                                                                                                                                                                                                                                                                                      | Choices: Very Unsatisfied, Somewhat Unsatisfied, Neither Satisfied nor Unsatisfied, Somewhat Satisfied, Very Satisfied |
| Since development of the Overnight Hospitalist program, the quality of care delivered at TGH GIM has:                                                                                                                                                                                                                                                                                                                                                                                                                                                                                                                                                                                                                                                                                                                                                                                                                                                                                                                                                                                                                                                                                                                                                                                                                                                                                                                                                                                                     | Choices: Increased, Stayed the Same, Decreased                                                                         |
| The Overnight Hospitalist program has decreased medical errors.                                                                                                                                                                                                                                                                                                                                                                                                                                                                                                                                                                                                                                                                                                                                                                                                                                                                                                                                                                                                                                                                                                                                                                                                                                                                                                                                                                                                                                           | Choices: Strongly Disagree, Somewhat Disagree, Neutral, Somewhat Agree, Strongly Agree                                 |
| The Overnight Hospitalist program leads to faster overnight evaluation of patients who are already admitted on the wards.                                                                                                                                                                                                                                                                                                                                                                                                                                                                                                                                                                                                                                                                                                                                                                                                                                                                                                                                                                                                                                                                                                                                                                                                                                                                                                                                                                                 | Choices: Strongly Disagree, Somewhat Disagree, Neutral, Somewhat Agree, Strongly Agree                                 |
| The Overnight Hospitalist program leads to faster evaluation of new patients in the emergency department.                                                                                                                                                                                                                                                                                                                                                                                                                                                                                                                                                                                                                                                                                                                                                                                                                                                                                                                                                                                                                                                                                                                                                                                                                                                                                                                                                                                                 | Choices: Strongly Disagree, Somewhat Disagree, Neutral, Somewhat Agree, Strongly Agree                                 |
| The educational experience on the internal medicine CTU has improved as a result of the Overnight Hospitalist / "nocturnist" program.                                                                                                                                                                                                                                                                                                                                                                                                                                                                                                                                                                                                                                                                                                                                                                                                                                                                                                                                                                                                                                                                                                                                                                                                                                                                                                                                                                     | Choices: Strongly Disagree, Somewhat Disagree, Neutral, Somewhat Agree, Strongly Agree                                 |
| The Overnight Hospitalist/"Nocturnist" Program has had which of the following effect on your medical billings:                                                                                                                                                                                                                                                                                                                                                                                                                                                                                                                                                                                                                                                                                                                                                                                                                                                                                                                                                                                                                                                                                                                                                                                                                                                                                                                                                                                            | Choices: Increased, No Change, Decrease, Not Sure                                                                      |
| <p>What are the benefits (if any) of the Overnight Hospitalist / "nocturnist" program? Please select all that apply from the reasons below.</p> <p><i>Trainees have no need to obtain handover from or cross-cover teams overnight</i></p> <p><i>Trainees do not need to handover in the morning to more than one team</i></p> <p><i>Trainees do not need to admit to more than one team overnight</i></p> <p><i>Trainees have fewer patients to evaluate and/or admit from the emergency department overnight</i></p> <p><i>Trainees do not need to manage transfers from other hospitals to the ward overnight</i></p> <p><i>Trainees have fewer distractions their admitting/call duties when working overnight</i></p> <p><i>There is a dedicated physician in-house to cover the GIM-Oncology patients (Team 10)</i></p> <p><i>There is a dedicated physician in-house to admit the GIM-Oncology Patients (Team 10)</i></p> <p><i>The physician covering GIM-Oncology Patients (Team 10) and admitting new patients to Team 10 is more experienced.</i></p> <p><i>There is a greater likelihood that the trainee will be able to rest/sleep overnight</i></p> <p><i>There is a greater likelihood that I will be able to rest/sleep overnight</i></p> <p><i>There is a reduced need for trainees to communicate with the attending physician overnight</i></p> <p><i>The nurses have improved access to physicians overnight regarding urgent patient issues</i></p> <p><i>None of the above</i></p> |                                                                                                                        |
| The Overnight Hospitalist / "Nocturnist" Program makes the hospital more attractive to residents.                                                                                                                                                                                                                                                                                                                                                                                                                                                                                                                                                                                                                                                                                                                                                                                                                                                                                                                                                                                                                                                                                                                                                                                                                                                                                                                                                                                                         | Choices: Strongly Disagree, Somewhat Disagree, Neutral, Somewhat Agree, Strongly Agree                                 |

The Overnight Hospitalist / "Nocturnist" Program improves my satisfaction while attending at Toronto General Hospital. Choices: Strongly Disagree, Somewhat Disagree, Neutral, Somewhat Agree, Strongly Agree

---

The Overnight Hospitalist / "Nocturnist" Program has improved patient care. Choices: Strongly Disagree, Somewhat Disagree, Neutral, Somewhat Agree, Strongly Agree

---

The Overnight Hospitalist / "Nocturnist" Program has reduced trainee burnout. Choices: Strongly Disagree, Somewhat Disagree, Neutral, Somewhat Agree, Strongly Agree

---

The Overnight Hospitalist / "Nocturnist" Program has reduced faculty/attending physician burnout. Choices: Strongly Disagree, Somewhat Disagree, Neutral, Somewhat Agree, Strongly Agree

---

Please enter any comments about the program below. No identifying information will be shared. Free-text response
